# Submit to *The Journal of Neuropsychiatry and Clinical Neurosciences*

As the official Journal of the American Neuropsychiatric Association, the premier national organization of clinicians and investigators in the interdisciplinary areas of neuropsychiatry, behavioral neurology, neuropsychology, and the cognitive neurosciences, *The Journal of Neuropsychiatry and Clinical Neurosciences* is dedicated to publishing the work of renowned researchers, clinicians, and educators to advance the care of patients. *The Journal of Neuropsychiatry and Clinical Neurosciences* publishes peer-reviewed articles addressing critical subjects such as Alzheimer's disease, traumatic brain injury, Parkinson's disease, epilepsy, and seizure disorders, and is devoted to reporting discoveries in clinical neuroscience that are relevant to understanding the brain-based disorders of patients.

Contributions of our content to the literature are reflected in the *Journal's* h-index. According to Web of Science, the lifetime (1989-present) h-index of JNCN is **104**.

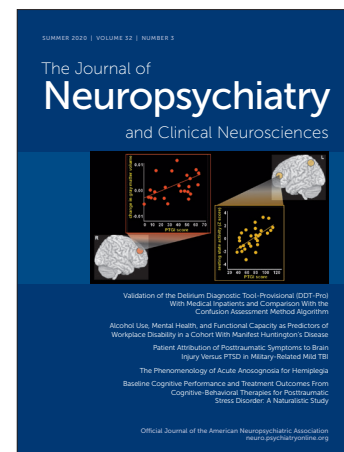

So far in 2020, our most downloaded articles include the following:

## ■ **Functional Neurological (Conversion) Disorder: A Core Neuropsychiatric Disorder**

From *The Journal of Neuropsychiatry and Clinical Neurosciences*, Volume 32, issue 1 (Winter 2020)

A special issue on functional neurological disorders leads off with this editorial from the special issue editors.

## ■ **On the Trail of White Matter**

From *The Journal of Neuropsychiatry and Clinical Neurosciences*, Volume 32, issue 3 (Summer 2020)

Christopher M. Filley, M.D., discusses in an Introspection piece the clinical implications of the concept of white matter dementia.

## ■ **Temporal Processing: Neural Correlates and Clinical Relevance**

From *The Journal of Neuropsychiatry and Clinical Neurosciences*, Volume 32, issue 2 (Spring 2020)

The issue's "Windows to the Brain" feature.

## ■ **Of Ghost Grandparents and Missing Limbs**

Published online May 13, 2020

In a moving Introspection piece, Miguel Restrepo-Martínez, M.D., relates how he counseled his grieving grandmother.
